# Supplementary material
Source: PubMed Central journal article supplement (PMC7343782)
Supplement: 41422_2020_350_MOESM1_ESM.pdf [file 41422_2020_350_MOESM1_ESM.pdf]

## Supplementary information, Figure S1

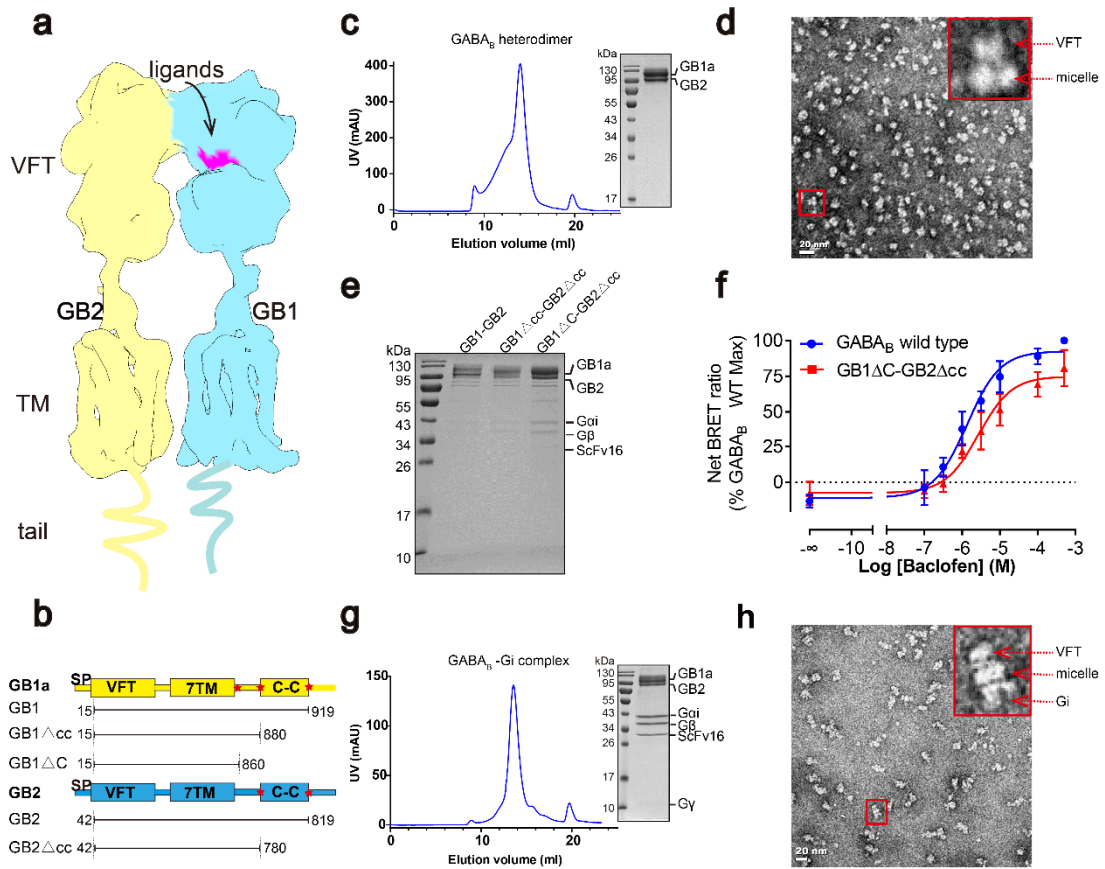

**Fig. S1 Purification and characterization of the GABA<sub>B</sub> heterodimer and GABA<sub>B</sub>-G $\alpha$ <sub>i11</sub> complex.** **a** Schematic diagram of the heterodimeric GABA<sub>B</sub> receptor. **b** Schematic diagram of constructs used in this study.  $\Delta$ cc represents the coiled-coil (c-c) domain is removed.  $\Delta$ C represents the entire C-terminus after TM domain in GB1 or GB2 is truncated. **c** Size-exclusion chromatography profile and SDS-PAGE gel of the purified antagonist-bound GABA<sub>B</sub> receptor. **d** Negative staining EM analysis of the purified inactive GABA<sub>B</sub> receptor shows the clear density for VFT and detergent micelles. **e** G protein pull-down analysis of the different truncations (GB1-GB2, GB1 $\Delta$ cc-GB2 $\Delta$ cc, and GB1 $\Delta$ C-GB2 $\Delta$ cc) of GABA<sub>B</sub> receptor. SDS-PAGE gel showed that GB1 $\Delta$ C-

GB2 $\Delta$ cc exhibits a greater efficiency in complex formation among these constructs and were selected for further structural study. **f** Dose-response curve of baclofen-induced BRET changes in the G $\alpha$ i sensors for the wide-type and GB1 $\Delta$ C-GB2 $\Delta$ cc construct of GABA<sub>B</sub> receptor (GABA<sub>B</sub> $\Delta$ cc), showing that GABA<sub>B</sub> $\Delta$ cc exhibits similar pharmacology to that of wild-type receptor. **g** Size-exclusion chromatography profile and SDS-PAGE gel of the purified agonist/PAM bound GABA<sub>B</sub>-G $\alpha$ i complex using GB1 $\Delta$ C-GB2 $\Delta$ cc construct. **h** Negative staining EM visualization of the purified GABA<sub>B</sub>-G $\alpha$ i complex showing clear density for VFT, detergent micelles and G $\alpha$ i protein.
