# Supplementary material
Source: PubMed Central journal article supplement (PMC7343782)
Supplement: 41422_2020_350_MOESM3_ESM.pdf [file 41422_2020_350_MOESM3_ESM.pdf]

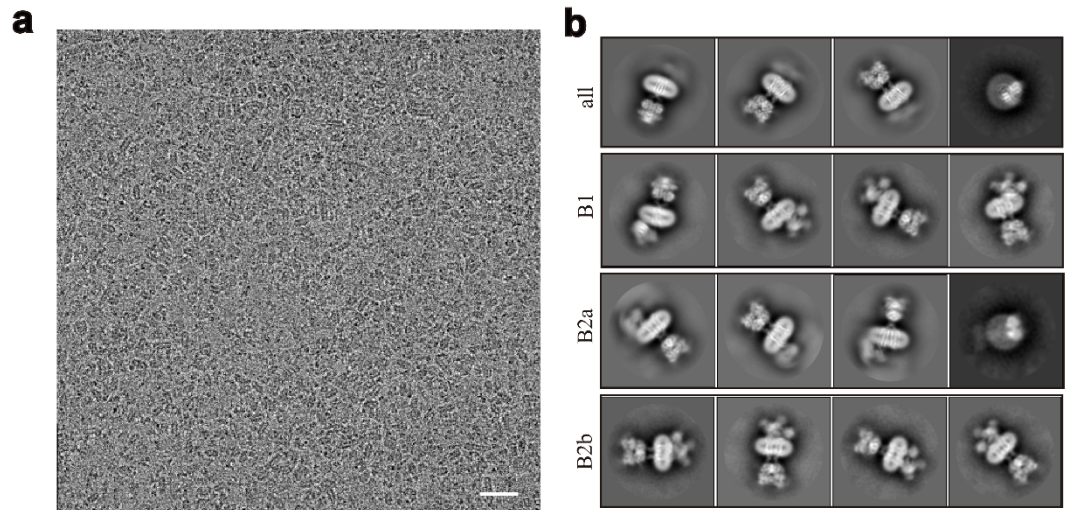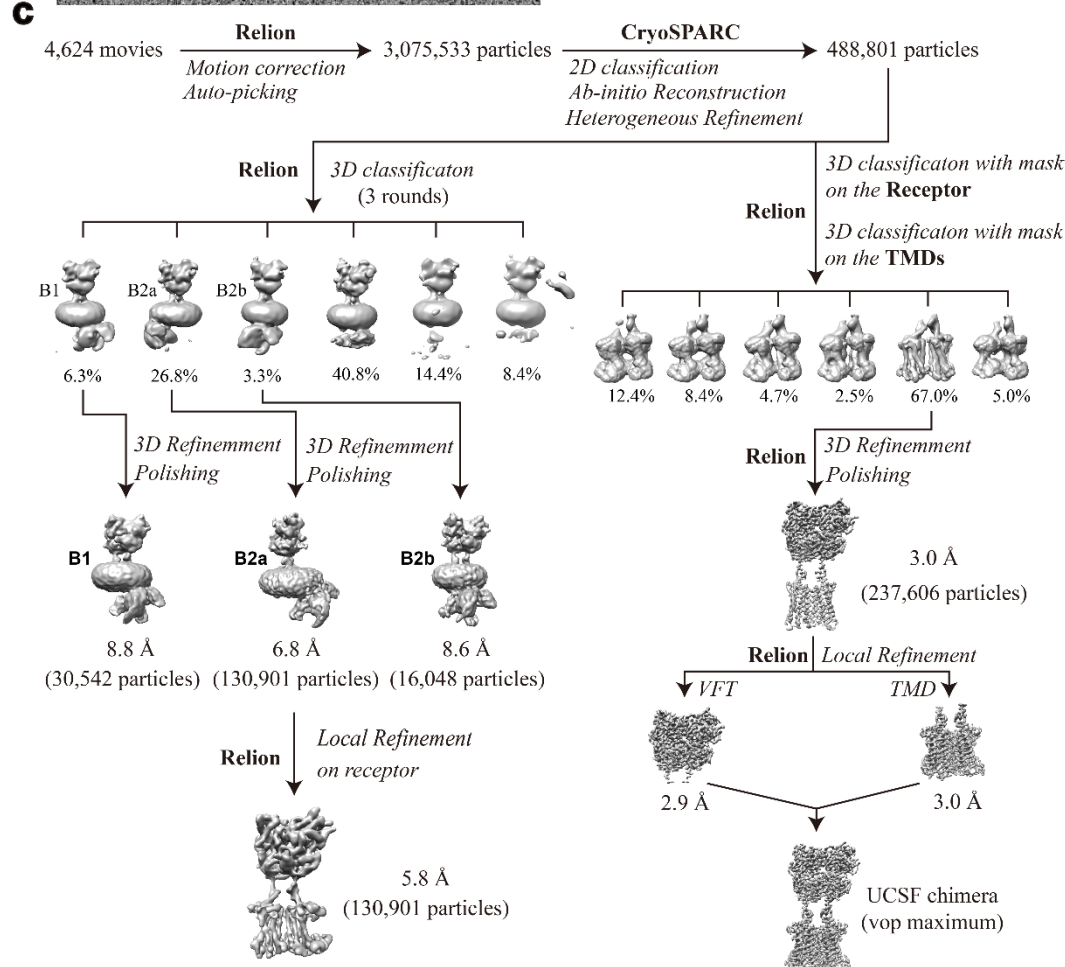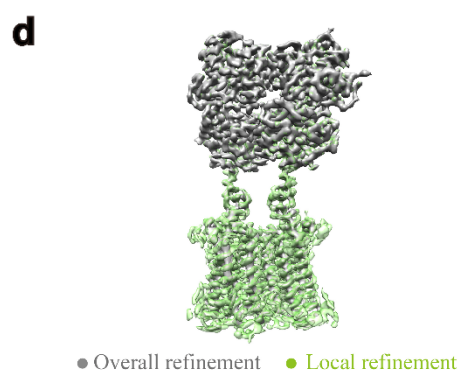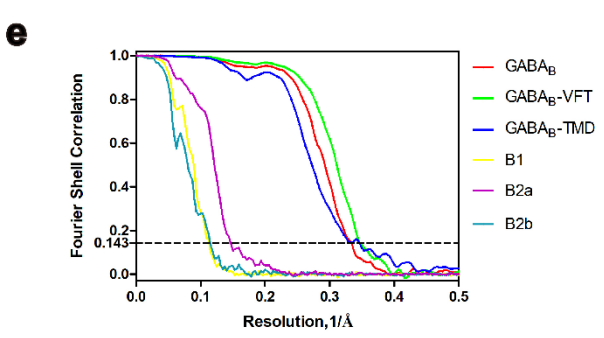

**Supplementary information, Figure S3 Single-particle reconstruction of the agonist/PAM-bound GABA<sub>B</sub>-G<sub>i1</sub> complex.** **a** Representative cryo-EM micrograph of the GABA<sub>B</sub>-G<sub>i1</sub> complex (scale bar: 30 nm). **b** Representative two-dimensional class averages of the overall refined GABA<sub>B</sub> receptor (all) and the GABA<sub>B</sub>-G<sub>i1</sub> complex in B1, B2a and B2b states, respectively (scale bar: 5 nm). **c** Flow chart of cryo-EM data processing. Details are described in method section. **d** Comparison of the overall refined map and the locally refined composite map. The locally refined composite map shows a substantial improvement for the TM density and exhibits almost the same conformation with the overall refined map. **e** Gold-standard Fourier shell correlation curves of overall refined receptor, the locally refined VFT and TMD and the refined GABA<sub>B</sub>-G<sub>i1</sub> complex in B1, B2a, B2b states.
