# Supplementary material
Source: PubMed Central journal article supplement (PMC7343782)
Supplement: 41422_2020_350_MOESM4_ESM.pdf [file 41422_2020_350_MOESM4_ESM.pdf]

## Supplementary information, Figure S4

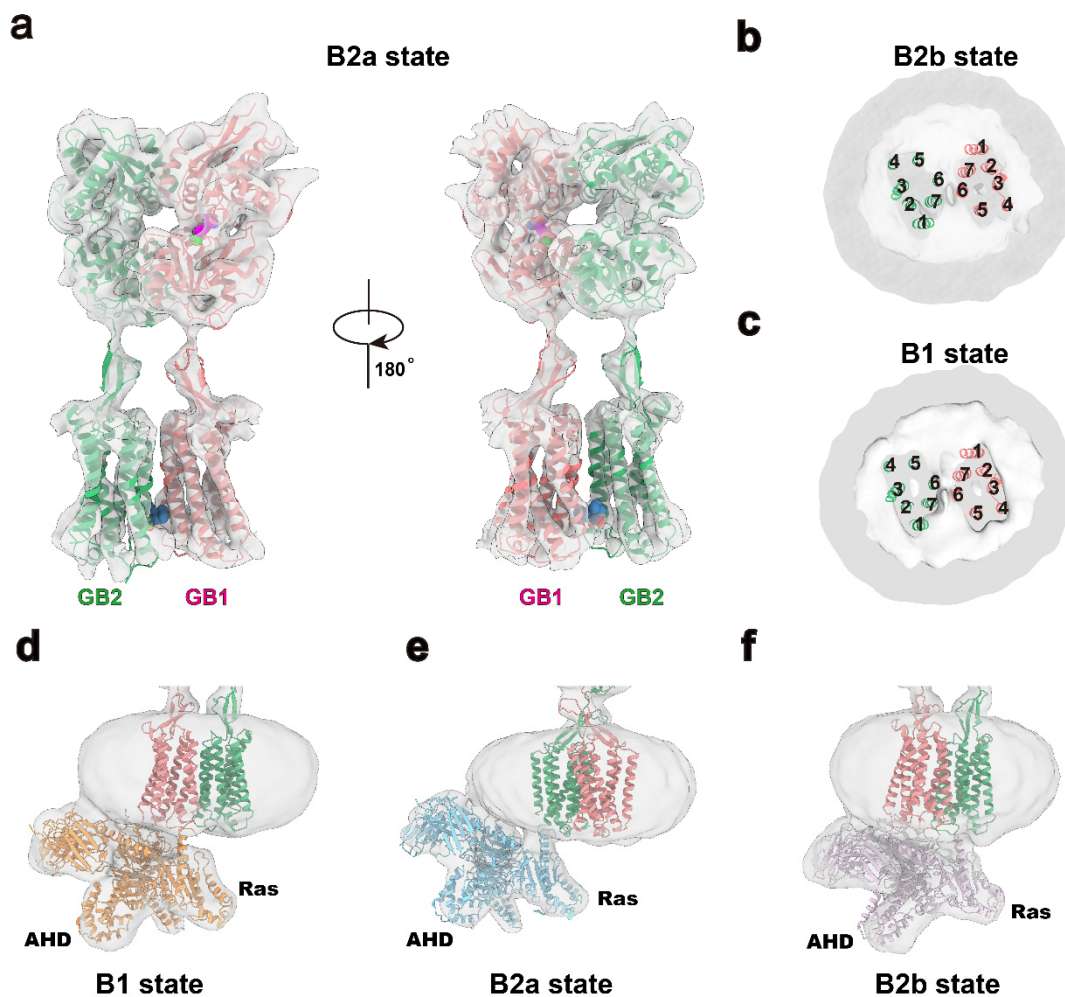

**Fig. S4 Fitting of the active GABA<sub>B</sub> structure into the cryo-EM density maps of GABA<sub>B</sub>-G<sub>i1</sub> complex in B2a, B2b and B1 states.** **a** Side views of the active GABA<sub>B</sub> structure derived from the high-resolution density map against cryo-EM map of GABA<sub>B</sub>-G<sub>i1</sub> complex in B2a state. **b-c** Cut through of bottom-up views of the active GABA<sub>B</sub> structure derived from the high-resolution density map against cryo-EM map of GABA<sub>B</sub>-G<sub>i1</sub> complex in B2b state (**b**) and B1 state (**c**), respectively. The model of GABA<sub>B</sub> receptor was rigid-body docked into the density. **d-f** Rigid body fitting of the G<sub>i1</sub>-scFv16 structure from the activated-CB2-G<sub>i1</sub> complex (PDB code: 6PT0) into the

cryo-EM density maps, revealing that most regions of the G<sub>11</sub>-scFv16 structure in a good agreement with the cryo-EM densities in B1 state (**d**), B2a state (**e**), and B2b state (**f**).
