# Supplementary material
Source: PubMed Central journal article supplement (PMC7343782)
Supplement: 41422_2020_350_MOESM5_ESM.pdf [file 41422_2020_350_MOESM5_ESM.pdf]

## Supplementary information, Figure S5

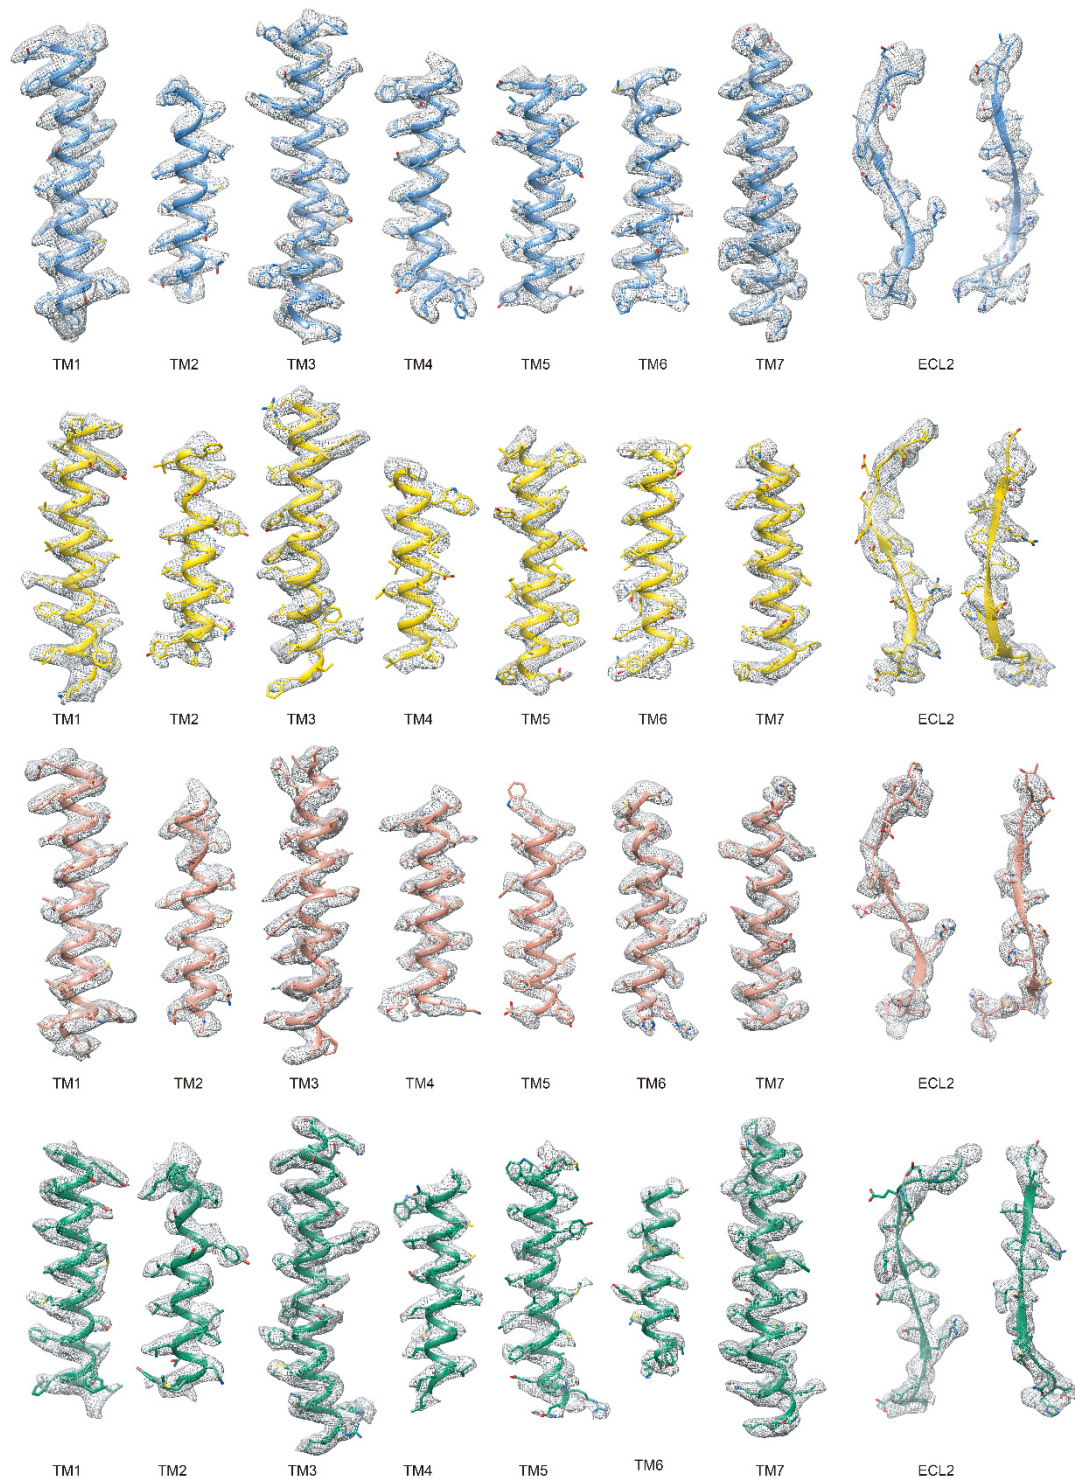

**Fig. S5 Electron density of transmembrane helices and ECL2 in GABA<sub>B</sub> receptor.**

Cryo-EM density of transmembrane helices of GABA<sub>B</sub> in inactive and active structures.

Inactive GB1 in blue; Inactive GB2 in yellow; Active GB1 in red; Active GB2 in green.
