# Supplementary material
Source: PubMed Central journal article supplement (PMC7343782)
Supplement: 41422_2020_350_MOESM6_ESM.pdf [file 41422_2020_350_MOESM6_ESM.pdf]

## Supplementary information, Figure S6

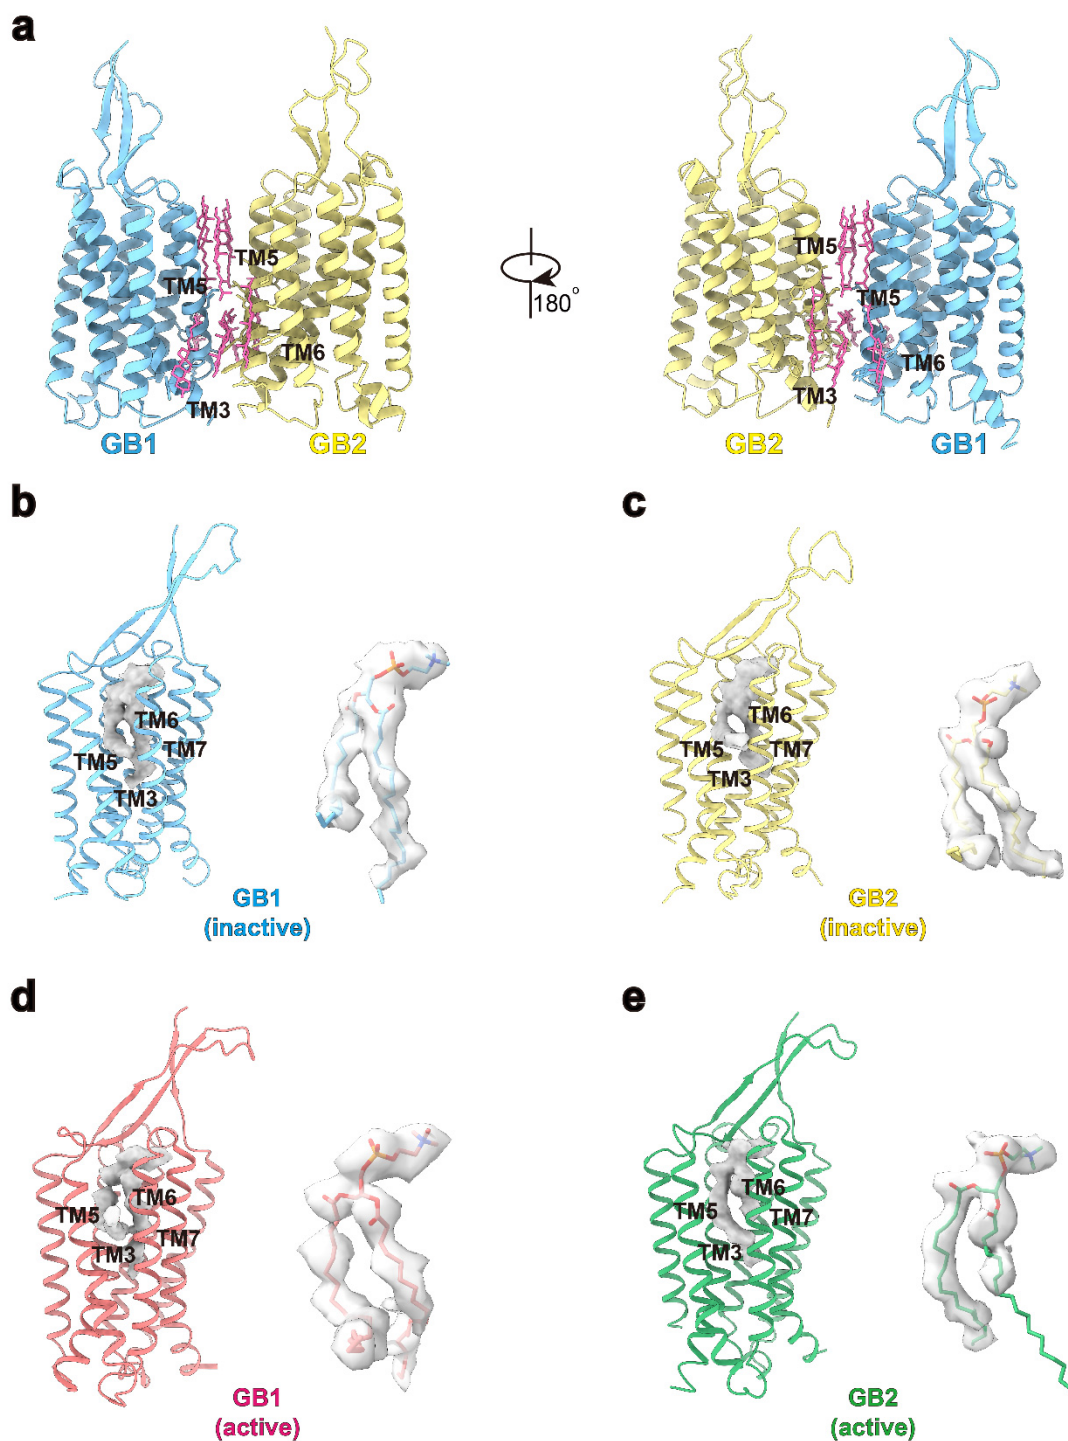

**Fig. S6 Putative cholesterol and phospholipids in GABA<sub>B</sub> receptor.** **a** The putative cholesterol between the inactive TM interface are shown. **b-e** Phospholipid-like densities inside the TM bundles of inactive and active GABA<sub>B</sub> structures. Fitting of the

phosphatidylcholine, the most abundant phospholipid in mammalian cells, into the unassigned densities in inactive and active states as an example to show the agreement between the phosphatidylcholine and the cryo-EM densities. Note that phosphatidylethanolamine might also occupy these sites. The buried surface area of each phospholipid in inactive GB1 (**a**), inactive GB2 (**b**), active GB1 (**c**) and active GB2 (**d**) is 1377 Å<sup>2</sup>, 1294 Å<sup>2</sup>, 1361 Å<sup>2</sup>, 1365 Å<sup>2</sup>, respectively. Inactive GB1 in blue; Inactive GB2 in yellow; Active GB1 in red; Active GB2 in green.
