# Supplementary material
Source: PubMed Central journal article supplement (PMC7343782)
Supplement: 41422_2020_350_MOESM8_ESM.pdf [file 41422_2020_350_MOESM8_ESM.pdf]

## Supplementary information, Figure S8

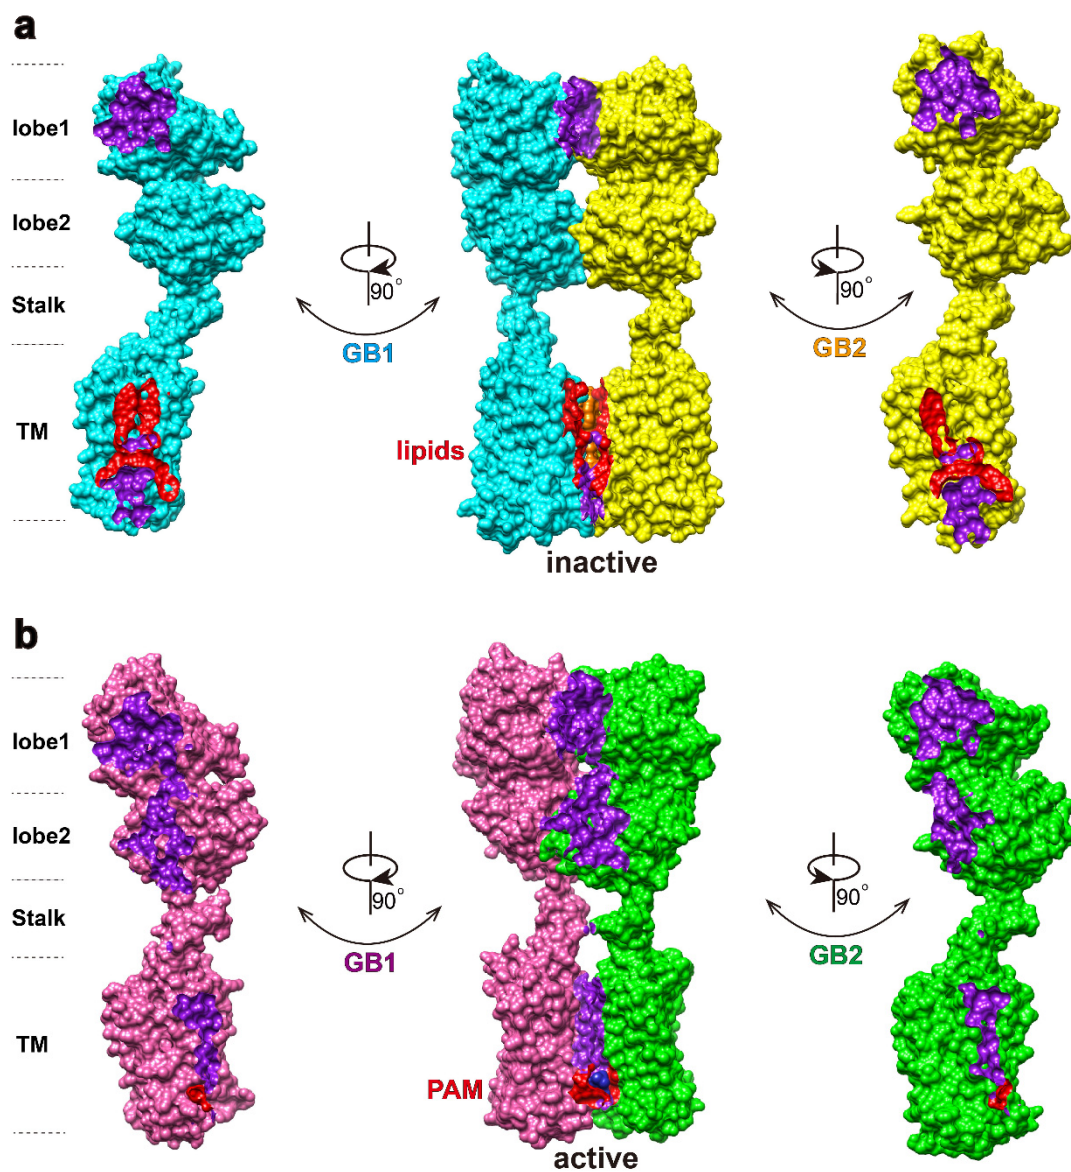

**Fig. S8 Comparison of the intersubunit interfaces in inactive and active GABA<sub>B</sub> receptor.** Intersubunit interfaces in inactive (a) and active (b) GABA<sub>B</sub> receptor. The direct interface of GB1 and GB2 are colored purple. The putative cholesterol and the PAM interfaces are colored red.
