# Supplementary material
Source: PubMed Central journal article supplement (PMC7343782)
Supplement: 41422_2020_350_MOESM9_ESM.pdf [file 41422_2020_350_MOESM9_ESM.pdf]

## Supplementary information, Figure S9

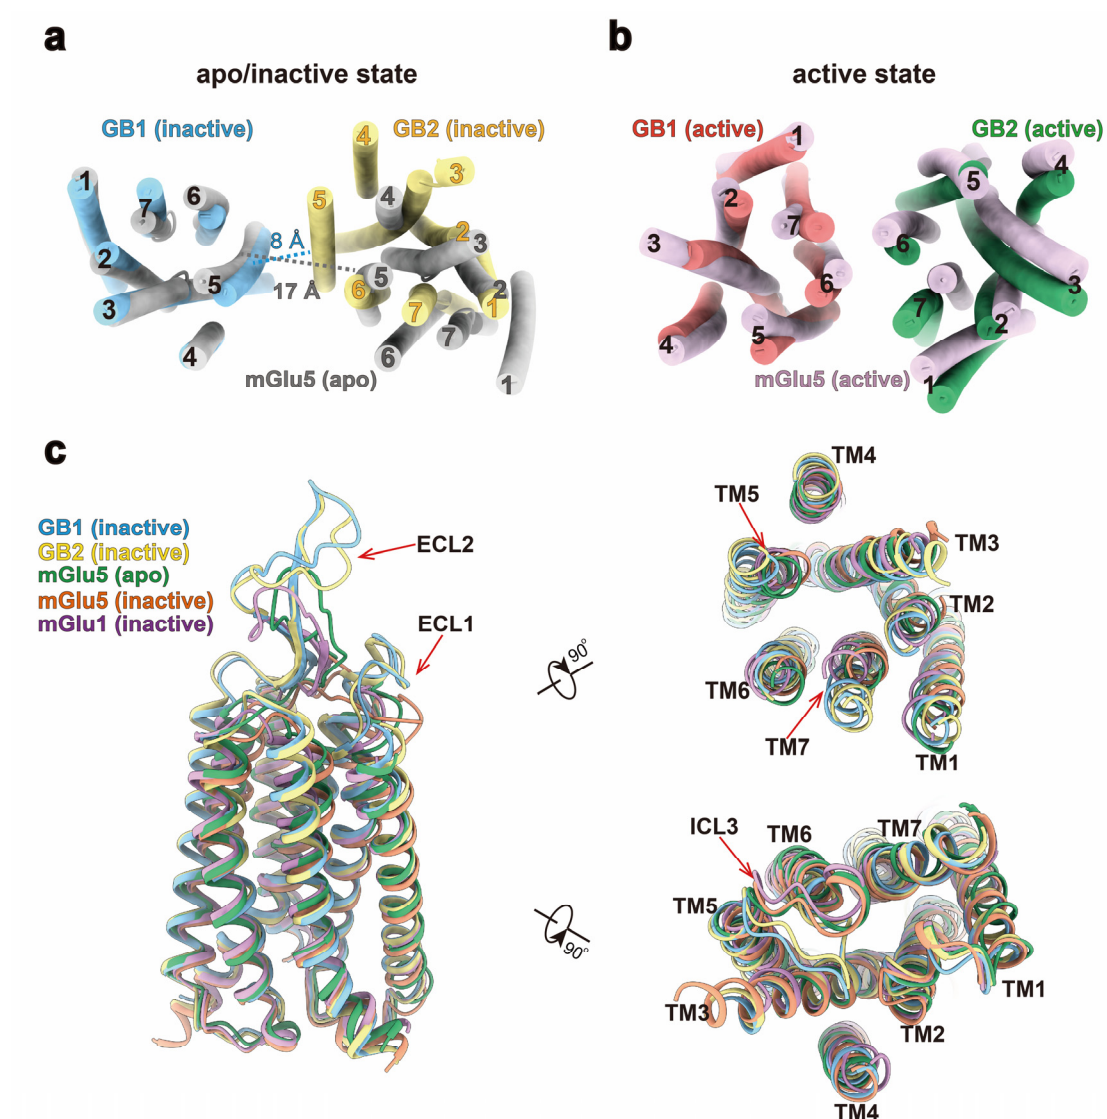

**Fig. S9 Structural comparison of GABA<sub>B</sub> with mGlu receptors.** a-b Extracellular view of the superposed TM bundles of GABA<sub>B</sub> and mGlu5 in inactive apo state (grey; PDB code: 6N52) (a) and active state (pink; PDB code: 6N51) (b). The TM5 helices of GABA<sub>B</sub> receptor are closer compared with that of the inactive mGlu5 receptor measured at the closest separation of TM5 helices. c Superimposition of TM domains of inactive GABA<sub>B</sub> receptor, inactive mGlu1 (PDB code: 4or2) and inactive, apo

mGlu5 (PDB code: 4oo9, 6N52). Red arrow represents the conformational difference of TM5, TM7, ECL1, ECL2, ICL3 between the GABA<sub>B</sub> and the mGlu receptors.
