# Supplementary material
Source: PubMed Central journal article supplement (PMC7343782)
Supplement: 41422_2020_350_MOESM10_ESM.pdf [file 41422_2020_350_MOESM10_ESM.pdf]

## Supplementary information, Figure S10

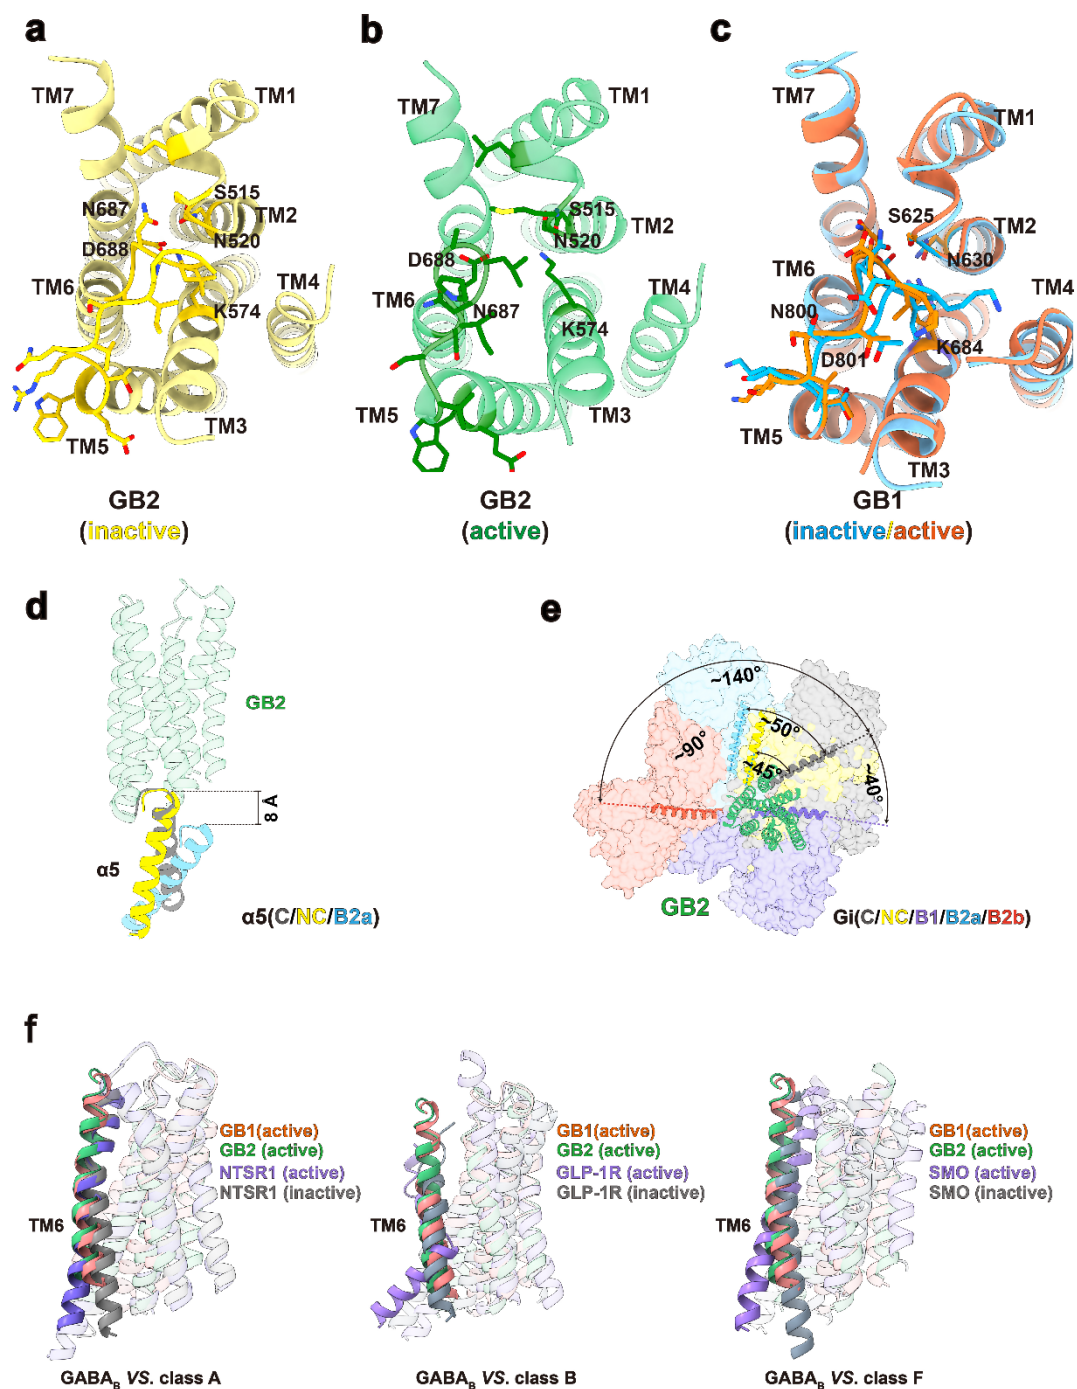

**Fig. S10** Conformation of ICL3 in inactive and active GABA<sub>B</sub> structures and the α5-receptor interface in GABA<sub>B</sub>-Gi<sub>11</sub> complex. **a-c** Interactions of the ICL3 with other residues of TM domain in GABA<sub>B</sub> in GB2 inactive (**a**), active state (**b**) and GB1 in both

states(c). **d** Comparison of the  $G\alpha_{i1}$   $\alpha 5$ -helix binding position between GB2 (B2a state) and the NTSR1– $G_{i1}$  protein complex in canonical (C; PDB code: 6OS9) and noncanonical (NC; PDB code: 6OSA) states. The position of  $\alpha 5$ -helix from GABA<sub>B</sub>– $G_i$  complex in different states show around 8 Å downward movement compared with that of NTSR1– $G_{i1}$  complex. Structures were aligned by the TM domains and only GB2 TM domain is shown for clarity. Color usage for  $\alpha 5$ : C state, grey; NC state, gold; B2a state, cyan. **e** Orientations of the  $G_i$  protein when coupling to GABA<sub>B</sub> and NTSR1 receptors. Rotation of  $G_i$  protein are measured by the  $\alpha N$  domains. Color usage for G proteins: C state, grey; NC state, gold; B1 state, purple; B2a state, cyan; and B2b state, red. **f** Comparison of the active GB1 and GB2 TM domains with the inactive and active structures of class A GPCR NTSR1 (PDB code: 4BUO and 6OS9 for inactive and active states, respectively), class B GPCR glucagon-like peptide-1 receptor (GLP-1R; PDB code: 5VEW and 6B3J for inactive and active states, respectively) and class F GPCR Smoothed receptor (SMO; PDB code: 6JKV and 6OT0 for inactive and active states, respectively), showing the positions of TM6 helices of GB1 and GB2 subunits are similar to that of the representative class A, B and F GPCR in the inactive state.
