# Supplementary material
Source: PubMed Central journal article supplement (PMC7343782)
Supplement: 41422_2020_350_MOESM11_ESM.pdf [file 41422_2020_350_MOESM11_ESM.pdf]

## Supplementary information, Table S1

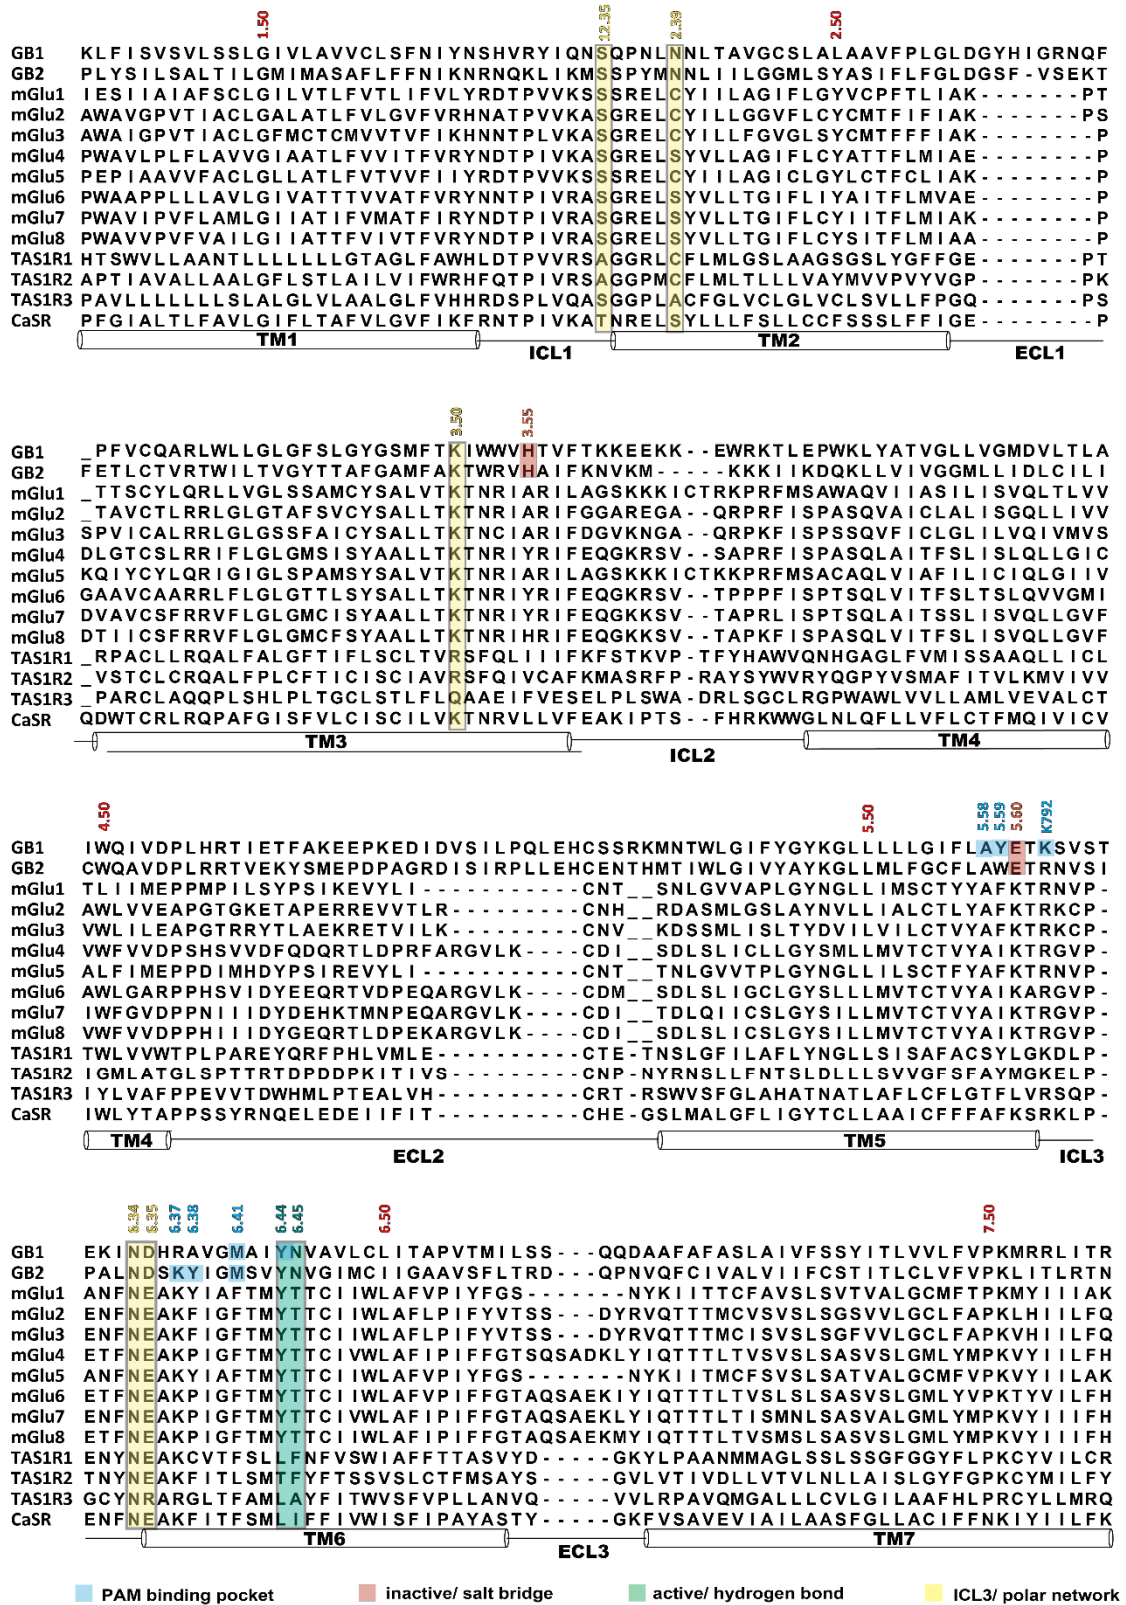

Table S1 Sequence alignment of TMs of class C GPCRs.

The sequence alignment of TMs of class C GPCRs was created using GPCRdb

(<http://www.gpcrdb.org>) and Jalview software. Secondary structure elements are annotated underneath the sequences. Highlighted are residues involved in PAM binding pocket (blue), salt bridge in inactive TM interface, hydrogen bond in active TM interface (green) and polar network stabilizing ICL3 (yellow).
